# Supplementary material
Source: PubMed Central journal article supplement (PMC3119261)
Supplement: NIHMS287053-supplement-01.pdf [file NIHMS287053-supplement-01.pdf]

# Additional Information

## Large-scale association analyses identifies 13 new susceptibility loci for coronary artery disease

### Additional Figures

Additional Figure 1: GWA studies ask for large numbers.

### Additional Tables

Additional Table 1a: Description of the genotyping methods in participating GWA studies in the discovery phase.

Additional Table 1b: Description of the genotyping methods in participating studies for replication.

Additional Table 2: Association analysis of novel regions assuming different modes of inheritance and estimating the likely mode of inheritance.

Additional Table 3: Non-synonymous or splice-site variants in linkage disequilibrium ( $r^2 > 0.8$ ,  $D' > 0.9$ ) with lead SNPs (from HapMap CEU).

Additional Table 4: eQTL results for the known and novel coronary disease loci.

Additional Table 5: Evidence of cis effects through allelic expression (AE) imbalance using a first generation AE map.

Additional Table 6: Novel and known coronary disease loci associated with other traits and diseases.

## Additional Figures

**Additional Figure 1: GWA studies ask for large numbers.** The figure represents the P for association with coronary disease at the chromosome 1p32.2 locus (denoted by red dots) depending on the number of cases and controls studied.

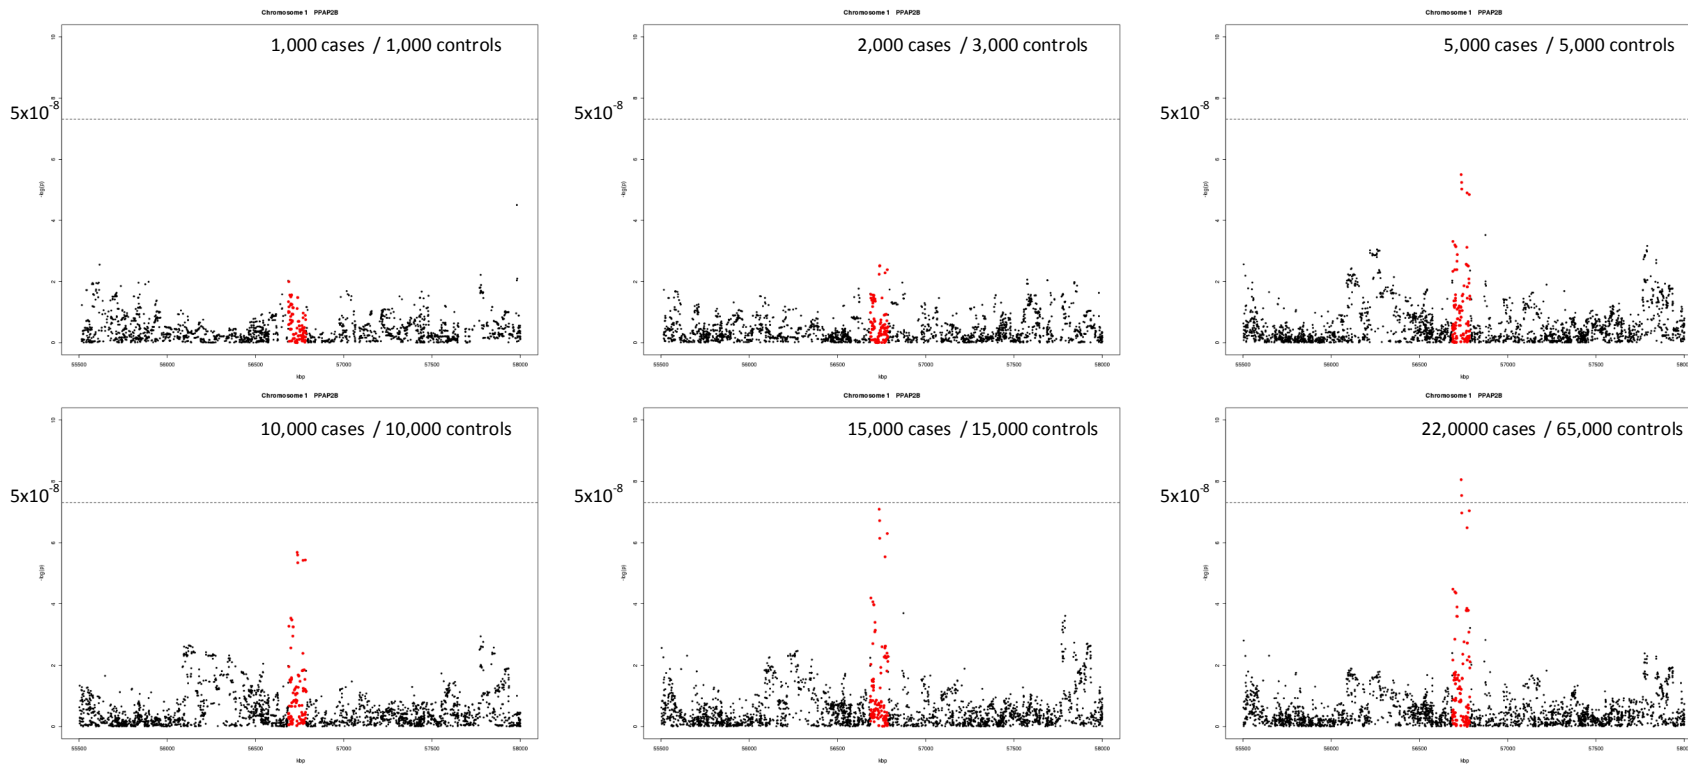

## Additional Tables

**Additional Table 1a:** Description of the genotyping methods in participating GWA studies in the discovery phase.

| Study             | Platform                                          | Calling    | Genotyped SNPs                | Imputation algorithms / NCBI build / HapMap | Total SNPs | QC at study center                                                                                                                                    |
|-------------------|---------------------------------------------------|------------|-------------------------------|---------------------------------------------|------------|-------------------------------------------------------------------------------------------------------------------------------------------------------|
| <b>ADVANCE</b>    | Illumina 550k v3                                  | BeadStudio | 561,466                       | BIMBAM / 36 / r22a                          | 3,732,514  | Sample call rate >0.985<br>SNP call rate >0.95<br>HWE p >0.001                                                                                        |
| <b>CADomics</b>   | Affymetrix Genome-Wide Human SNP Array 6.0        | Birdseed   | 602,459                       | IMPUTE / 36 / r22a                          | 2,588,156  | Sample call rate >0.97<br>SNP call rate >0.98<br>HWE p(controls) >10 <sup>-4</sup><br>MAF >0.01                                                       |
| <b>CHARGE*</b>    | Illumina HCNV370 Duo BeadChip                     | BeadStudio | 353,202                       | MACH/36/ r22                                | 2,533,153  | Sample call rate >0.97<br>SNP call rate >0.97<br>HWE p(controls) >10 <sup>-6</sup><br>MAF >0.01                                                       |
| <b>CHARGE*</b>    | Affymetrix 6.0                                    | Birdseed   | 589,253                       | MACH/35/r21                                 | 2,516,204  | Sample call rate >0.95<br>SNP call rate >0.90<br>HWE p>10 <sup>-6</sup>                                                                               |
|                   | Affymetrix 500K (Nsp 250K and Sty 250K) + MPS 50k | BRLMM      | 534,982                       | MACH/36/ r22,                               | 2,543,887  | Sample call rate >0.97<br>SNP call rate >0.97<br>Subject heterozygosity <5 SD from mean<br>No excessive Mendelian errors                              |
|                   | Illumina Infinium HumanHap 550K                   | BeadStudio | 530,683                       | MACH/36/ r22,                               | 2,586,725  | Subject call rate >0.975,<br>heterozygosity <0.336,<br>match on sex, no IBS outliers,<br>SNP call rate >=0.98, HWE p >10 <sup>-6</sup> ,<br>MAF >0.01 |
| <b>deCODE CAD</b> | Illumina HH300/HHCNV370                           | BeadStudio |                               | Impute / 36                                 |            | Sample call rate >0.98<br>SNP call rate >0.96                                                                                                         |
| <b>GerMIFS I</b>  | Affymetrix Mapping 500K Array Set                 | BRLMM      | 262,338(NSP)/<br>238,378(STY) | MACH / 36 / r22a                            | 2,543,887  | Sample call rate >0.97<br>SNP call rate >0.98<br>HWE p(controls) >10 <sup>-4</sup><br>MAF >0.01                                                       |

| Study                          | Platform                                                            | Calling         | Genotyped SNPs                | Imputation algorithms / NCBI build / HapMap | Total SNPs | QC at study center                                                                              |
|--------------------------------|---------------------------------------------------------------------|-----------------|-------------------------------|---------------------------------------------|------------|-------------------------------------------------------------------------------------------------|
| <b>GerMIFS II</b>              | Affymetrix Genome-Wide Human SNP Array 6.0                          | Birdseed        | 909,622                       | MACH / 36 / r22a                            | 2,543,887  | Sample call rate >0.97<br>SNP call rate >0.98<br>HWE p(controls) >10 <sup>-4</sup><br>MAF >0.01 |
| <b>GerMIFS III (KORA)</b>      | Affymetrix Genome-Wide Human SNP Array 5.0 / 6.0                    | BRLMM-P         | 503,590(5.0)/<br>904,954(6.0) | MACH / 36 / r22a                            | 2,536,369  | Sample call rate >0.97<br>SNP call rate >0.98<br>HWE p(controls) >10 <sup>-4</sup><br>MAF >0.01 |
| <b>LURIC/<br/>AtheroRemo 1</b> | Affymetrix Genome-Wide Human SNP Array 6.0                          | Birdseed        | 905,484                       | NA                                          | 905,484    | SNP call rate >0.9 <sup>†</sup>                                                                 |
| <b>LURIC/<br/>AtheroRemo 2</b> | Affymetrix Mapping 500K Array Set                                   | DM-3            | 492,555                       | NA                                          | 492,555    | SNP call rate >0.9 <sup>†</sup>                                                                 |
| <b>MedStar</b>                 | Affymetrix Genome-Wide Human SNP Array 6.0                          | Birdseed        | 869,223                       | MACH / 36 / r22a                            | 2,749,197  | Sample call rate >0.95<br>SNP call rate >0.95<br>HWE – NA<br>MAF – NA                           |
| <b>MIGen</b>                   | Affymetrix Genome-Wide Human SNP Array 6.0                          | Birdseed        | 727,496                       | MACH / 35                                   | 2,557,744  | Sample call rate >0.95<br>SNP call rate >0.95<br>HWE p(controls) >10 <sup>-6</sup><br>MAF >0.01 |
| <b>OHGS 1</b>                  | Affymetrix Mapping 500K Array Set / Genome-Wide Human SNP Array 6.0 | BRLMM/ Birdseed | 325,040                       | Impute / 36 / r22                           | 2,469,454  | SNP call rate >0.95<br>HWE p(controls) >10 <sup>-3</sup><br>MAF >0.05                           |
| <b>PennCATH</b>                | Affymetrix Genome-Wide Human SNP Array 6.0                          | Birdseed        | 869,223                       | MACH / 36 / r22a                            | 2,749,197  | Sample call rate >0.95<br>SNP call rate >0.95<br>HWE – NA<br>MAF – NA                           |
| <b>WTCCC</b>                   | Affymetrix Mapping 500K Array Set                                   | CHIAMO          | 477,459                       | IMPUTE / 36                                 | 2,614,446  | Sample call rate >0.97<br>SNP call rate >0.98<br>HWE p(controls) >10 <sup>-4</sup><br>MAF - NA  |

ADVANCE = Atherosclerotic Disease, VAscular functioN, and genetiC Epidemiology; GerMIFS = German Myocardial Infarction Family Studies; WTCCC = Wellcome Trust Case Control Consortium; CHARGE = Cohorts for Heart and Aging Research in Genomic Epidemiology; LURIC = Ludwigshafen Risk and Cardiovascular Health Study; OHGS = Ottawa Heart Genomics Study

QC = quality control; HWE = test for deviation from Hardy-Weinberg equilibrium; MAF = minor allele frequency

\* Four entries for Charge refer to the studies AGES, ARIC, Fram HS, and RS

† Further criteria in LURIC/AtheroRemo: Removed samples based on relatedness, incorrect gender, outliers in the MDS map

**Additional Table 1b:** Description of the genotyping methods in participating studies for replication.

| <b>Study</b>                                       | <b>Genotyping Platform</b>     |
|----------------------------------------------------|--------------------------------|
| <b>AMI/DHS</b>                                     | Sequenom                       |
| <b>ADVANCE</b>                                     | TaqMan OpenArray               |
| <b>AMC-PAS</b>                                     | Sequenom                       |
| <b>Angio-Lueb/GoKard</b>                           | Sequenom                       |
| <b>CHAOS</b>                                       | Sequenom                       |
| <b>CC/OHGS2</b>                                    | Affymetrix 6.0                 |
| <b>EPIC-CAD</b>                                    | Sequenom                       |
| <b>GENDER</b>                                      | Sequenom                       |
| <b>GraceGenetics</b>                               | Sequenom                       |
| <b>INTERHEART/EpiDREAM/OHGS3</b>                   | Affymetrix 6.0                 |
| <b>IHCS</b>                                        | Sequenom                       |
| <b>IFS</b>                                         | Sequenom                       |
| <b>IATVB</b>                                       | Affymetrix 6.0                 |
| <b>LEEDS</b>                                       | Sequenom                       |
| <b>MDCS</b>                                        | Sequenom                       |
| <b>MAHI</b>                                        | Sequenom                       |
| <b>PopGen</b>                                      | Sequenom                       |
| <b>SAS</b>                                         | Sequenom                       |
| <b>SMILE</b>                                       | Sequenom                       |
| <b>SHEEP</b>                                       | Sequenom                       |
| <b>The Emory Genebank Study</b>                    | Centaurus (Nanogen)            |
| <b>The Johns Hopkins GeneSTAR Research Program</b> | Illumina HumanHap 1M BeadArray |
| <b>The New Zealand CAD Study</b>                   | Centaurus (Nanogen)            |
| <b>THISEAS</b>                                     | Sequenom                       |
| <b>UKMI</b>                                        | Sequenom                       |
| <b>VHS</b>                                         | Sequenom                       |

For explanation of study abbreviations, see Supplementary Table 1b.

**Additional Table 2:** Association analysis of novel regions assuming different modes of inheritance and estimating the likely mode of inheritance.

| SNP               | Band     | Gene in region               | Risk allele | P additive            | P dominant            | P recessive           | MOI |
|-------------------|----------|------------------------------|-------------|-----------------------|-----------------------|-----------------------|-----|
| <b>rs17114036</b> | 1p32.2   | <i>PPAP2B</i>                | A           | $1.43 \cdot 10^{-08}$ | $9.87 \cdot 10^{-02}$ | $7.63 \cdot 10^{-10}$ | rec |
| <b>rs17609940</b> | 6p21.31  | <i>ANKS1A</i>                | G           | $2.21 \cdot 10^{-06}$ | $4.30 \cdot 10^{-03}$ | $1.57 \cdot 10^{-06}$ | rec |
| <b>rs12190287</b> | 6q23.2   | <i>TCF21</i>                 | C           | $4.64 \cdot 10^{-11}$ | $1.00 \cdot 10^{-04}$ | $1.12 \cdot 10^{-08}$ | add |
| <b>rs11556924</b> | 7q32.2   | <i>ZC3HC1</i>                | C           | $2.22 \cdot 10^{-09}$ | $6.88 \cdot 10^{-06}$ | $1.70 \cdot 10^{-07}$ | add |
| <b>rs579459</b>   | 9q34.2   | <i>ABO</i>                   | C           | $1.16 \cdot 10^{-07}$ | $1.18 \cdot 10^{-08}$ | $1.50 \cdot 10^{-02}$ | dom |
| <b>rs12413409</b> | 10q24.32 | <i>CYP17A1, CNNM2, NT5C2</i> | G           | $1.47 \cdot 10^{-06}$ | $2.11 \cdot 10^{-02}$ | $1.52 \cdot 10^{-05}$ | rec |
| <b>rs964184</b>   | 11q23.3  | <i>ZNF259, APOA5, APOA1</i>  | G           | $8.02 \cdot 10^{-10}$ | $1.59 \cdot 10^{-09}$ | $6.00 \cdot 10^{-04}$ | add |
| <b>rs4773144</b>  | 13q34    | <i>COL4A1, COL4A2</i>        | G           | $4.15 \cdot 10^{-07}$ | $8.99 \cdot 10^{-06}$ | $3.00 \cdot 10^{-04}$ | add |
| <b>rs2895811</b>  | 14q32.2  | <i>HHIPL1, CYP46A1</i>       | C           | $2.67 \cdot 10^{-07}$ | $1.20 \cdot 10^{-03}$ | $2.71 \cdot 10^{-06}$ | rec |
| <b>rs3825807</b>  | 15q25.1  | <i>ADAMTS7</i>               | A           | $9.63 \cdot 10^{-06}$ | $1.60 \cdot 10^{-03}$ | $1.35 \cdot 10^{-05}$ | rec |
| <b>rs12936587</b> | 17p11.2  | <i>Rall, PEMT, RADS1</i>     | G           | $4.89 \cdot 10^{-07}$ | $2.00 \cdot 10^{-04}$ | $3.05 \cdot 10^{-06}$ | add |
| <b>rs216172</b>   | 17p13.3  | <i>SMG6, SRR</i>             | C           | $6.22 \cdot 10^{-07}$ | $5.87 \cdot 10^{-08}$ | $4.00 \cdot 10^{-04}$ | dom |
| <b>rs46522</b>    | 17q21.32 | <i>UBE2Z</i>                 | T           | $3.57 \cdot 10^{-06}$ | $1.55 \cdot 10^{-05}$ | $6.17 \cdot 10^{-05}$ | add |

P additive, dominant and recessive = association p-values assuming an additive, dominant and recessive mode of inheritance. MOI = estimated mode of inheritance.

**Additional Table 3:** Non-synonymous or splice-site variants in linkage disequilibrium ( $r^2 > 0.8$ ,  $D' > 0.9$ ) with lead SNPs (from HapMap CEU).

| Band            | Lead SNP   | Proxy SNP | Distance from lead SNP | $r^2$ | $D'$ | Gene           | Coding change | Type                           |
|-----------------|------------|-----------|------------------------|-------|------|----------------|---------------|--------------------------------|
| <b>7q32.2</b>   | rs11556924 |           | 0                      | 1     | 1    | <i>ZC3HC1</i>  | R363H         | non-synonymous                 |
| <b>14q32.2</b>  | rs2895811  | rs7158073 | 7,747                  | 0.82  | 0.95 | <i>HHIPL1</i>  | V691A         | non-synonymous                 |
| <b>15q25.1</b>  | rs3825807  |           | 0                      | 1     | 1    | <i>ADAMTS7</i> | S214P         | non-synonymous                 |
| <b>17q21.32</b> | rs46522    | rs2291725 | 50,535                 | 1     | 1    | <i>GIP</i>     | S103G         | non-synonymous                 |
|                 |            | rs2291726 | 50,657                 | 0.94  | 1    | <i>GIP</i>     | c.258-73A>G   | cryptic splice-site alteration |

**Additional Table 4: eQTL results for the known and novel coronary disease loci.**

| Band                                     | SNP           | Position  | Gene (Transcript)                        | Tissue      | E <sup>a</sup> | P                      | P <sub>adj</sub> <sup>b</sup> | SNP with strongest association with expression <sup>c</sup> |                        |                               |
|------------------------------------------|---------------|-----------|------------------------------------------|-------------|----------------|------------------------|-------------------------------|-------------------------------------------------------------|------------------------|-------------------------------|
|                                          |               |           |                                          |             |                |                        |                               | SNP ( $r^2$ ) <sup>d</sup>                                  | P                      | P <sub>adj</sub> <sup>e</sup> |
| <i>Novel loci reported in this study</i> |               |           |                                          |             |                |                        |                               |                                                             |                        |                               |
| 6q23.2                                   | rs12190287[C] | 134256218 | <i>TCF21</i> (NM_003206)                 | Omental     | +              | $1.2 \times 10^{-8}$   |                               |                                                             |                        |                               |
| "                                        | "             | "         | <i>TCF21</i> (NM_003206)                 | Liver       | +              | $2.3 \times 10^{-8}$   |                               |                                                             |                        |                               |
| 17p11.2                                  | rs12936587[G] | 17484447  | <i>PEMT</i> (ILMN_1745806) <sup>f</sup>  | Monocytes   | -              | $3.1 \times 10^{-9}$   |                               |                                                             |                        |                               |
| "                                        | "             | "         | <i>RASD1</i> (ILMN_1740426) <sup>f</sup> | Monocytes   | +              | $2.0 \times 10^{-14}$  |                               |                                                             |                        |                               |
| "                                        | "             | "         | <i>SMCR3</i> (HSS00330572)               | Subq        | +              | $9.9 \times 10^{-12}$  | 0.73                          | rs12945496 (0.85)                                           | $1.5 \times 10^{-13}$  | 0.48                          |
| 17q21.32                                 | rs46522[T]    | 44343596  | <i>UBE2Z</i> (NM_023079)                 | Blood       | +              | $1.7 \times 10^{-12}$  | 0.82                          | rs12453394 (0.93)                                           | $9.9 \times 10^{-13}$  | 0.33                          |
| <i>Previously reported loci</i>          |               |           |                                          |             |                |                        |                               |                                                             |                        |                               |
| 1p13.3                                   | rs599839[A]   | 109623689 | <i>PSRC1</i> (ILMN_1671843) <sup>g</sup> | Monocytes   | -              | $7.7 \times 10^{-21}$  |                               |                                                             |                        |                               |
| "                                        | "             | "         | <i>PSRC1</i> (ILMN_1671843) <sup>g</sup> | Macrophages | -              | $4.8 \times 10^{-20}$  |                               |                                                             |                        |                               |
| "                                        | "             | "         | <i>PSRC1</i> (ILMN_2315964) <sup>g</sup> | Macrophages | -              | $9.8 \times 10^{-7}$   |                               |                                                             |                        |                               |
| "                                        | "             | "         | <i>PSRC1</i> (NM_032636)                 | Subq        | -              | $1.3 \times 10^{-9}$   | 0.66                          | rs4970834 (0.60)                                            | $2.7 \times 10^{-11}$  | 0.19                          |
| "                                        | "             | "         | <i>CELSR2</i> (NM_001408)                | Liver       | -              | $2.8 \times 10^{-70}$  | 1                             | rs646776 (0.89)                                             | $5.0 \times 10^{-73}$  | 0.78                          |
| "                                        | "             | "         | <i>PSRC1</i> (NM_032636)                 | Liver       | -              | $1.2 \times 10^{-182}$ | 0.97                          | rs646776 (0.89)                                             | $1.4 \times 10^{-193}$ | 0.51                          |
| "                                        | "             | "         | <i>SORT1</i> (AK000757)                  | Liver       | -              | $4.7 \times 10^{-213}$ | 0.86                          | rs646776 (0.89)                                             | $3.8 \times 10^{-227}$ | 0.49                          |
| "                                        | "             | "         | <i>SORT1</i> (NM_002959)                 | Liver       | -              | $2.1 \times 10^{-141}$ | 0.94                          | rs646776 (0.89)                                             | $4.8 \times 10^{-147}$ | 0.75                          |
| "                                        | "             | "         | <i>PSRC1</i> (NM_032636)                 | Blood       | -              | $2.1 \times 10^{-24}$  | 0.14                          | rs660240 (0.85)                                             | $1.1 \times 10^{-26}$  | 0.00085                       |
| 3q22.3                                   | rs2306374[C]  | 139602642 | (hCT1951505.1)                           | Subq        | +              | $3.7 \times 10^{-6}$   |                               |                                                             |                        |                               |
| 9p21.3                                   | rs4977574[G]  | 22088574  | <i>CDKN2B</i> (NM_078487)                | Omental     | -              | $5.0 \times 10^{-6}$   | 0.98                          | rs2383207 (0.90)                                            | $1.0 \times 10^{-6}$   | 0.82                          |
| 19p13.2                                  | rs1122608[G]  | 11024601  | <i>SMARCA4</i> (NM_003072)               | Omental     | +              | $9.2 \times 10^{-6}$   | 0.69                          | rs7258189 (0.70)                                            | $4.6 \times 10^{-6}$   | 0.71                          |
| 21q22.11                                 | rs9982601[T]  | 34520998  | <i>MRPS6</i> (NM_032476)                 | Blood       | +              | $5.6 \times 10^{-11}$  | 0.55                          | rs7278204 (0.84)                                            | $2.7 \times 10^{-11}$  | 0.19                          |

All expression associations with  $P < 10^{-5}$  where the coronary artery disease SNP is the strongest expression SNP (eSNP) in the region for the given genes or is in high correlation ( $r^2 \geq 0.60$ ) with the strongest eSNP. <sup>a</sup>Direction of effect. <sup>b</sup>P for correlation tested conditional on the SNP that shows most significant correlation with expression. <sup>c</sup>The SNP in the 1 Mb window that shows the strongest correlation with expression. <sup>d</sup>Correlation  $r^2$  between the coronary artery disease-associated SNP and the SNP that shows strongest correlation with expression. <sup>e</sup>P for correlation tested conditioned on the coronary artery disease-associated SNP. <sup>f</sup>A proxy, rs2955359, with  $r^2 = 0.85$  with rs12936587 was tested. <sup>g</sup>A proxy, rs646776, with  $r^2 = 0.89$  with rs599839 was tested. A more detailed explanation of the table contents and analyses is provided in Supplementary Methods.



**Additional Table 5: Evidence of cis effects through allelic expression (AE) imbalance using a first generation AE map** (Ge B, Pokholok DK, Kwan T, et al. Global patterns of cis variation in human cells revealed by high-density allelic expression analysis. Nat Genet 2009;41:1216-22). Only CARDIoGRAM lead SNPs located within one or more of the 7785 significant measure AE windows reported by Ge et al. are included. Entries with high LD ( $r^2 > 0.5$ ) are shaded in grey.

| CARDIOGRAM lead SNP                                   |     |           | Measured AE window |              |                      | Allelic expression association |              |            |           |                     |                                        | Transcript overlapping AE window |              |             |              |
|-------------------------------------------------------|-----|-----------|--------------------|--------------|----------------------|--------------------------------|--------------|------------|-----------|---------------------|----------------------------------------|----------------------------------|--------------|-------------|--------------|
| rs                                                    | chr | position  | Start position     | End position | No. of Measured SNPs | Start position                 | End position | Tag-SNP    | Nominal P | Significance level* | r <sup>2</sup> between Tag & lead SNPs | Start position                   | End position | GENE SYMBOL | locuslink ID |
| <b>Novel Loci</b>                                     |     |           |                    |              |                      |                                |              |            |           |                     |                                        |                                  |              |             |              |
| <b>Window based AE association</b>                    |     |           |                    |              |                      |                                |              |            |           |                     |                                        |                                  |              |             |              |
| rs17114036                                            | 1   | 56735409  | 56748430           | 56770370     | 6                    | 56684634                       | 56741065     | rs7525717  | 3.14E-05  | 0.005               | 0.0495                                 | 56732526                         | 56817845     | PPAP2B      | 8613         |
| rs11556924                                            | 7   | 129450732 | 129403173          | 129445118    | 9                    | 129416799                      | 129485998    | rs2242488  | 2.80E-05  | 0.005               | 0.235                                  | 129445361                        | 129478469    | ZC3HC1      | 51530        |
| rs579459                                              | 9   | 135143989 | 135141266          | 135182445    | 13                   | 135122575                      | 135149361    | rs579459   | 4.48E-06  | 0.001               | 1                                      | 135115608                        | 135454453    | ABO         | 28           |
| rs12413409                                            | 10  | 104709086 | 104747699          | 104804152    | 12                   | 104618863                      | 104859028    | rs3897401  | 1.18E-07  | 0.001               | 0.0323                                 | 104668061                        | 104828334    | CNNM2       | 54805        |
| rs12413409                                            | 10  | 104709086 | 104839458          | 104842638    | 3                    | 104618863                      | 104921574    | rs12764154 | 1.37E-07  | 0.001               | 0.0187                                 | 104837903                        | 104943041    | NT5C2       | 22978        |
| rs12413409                                            | 10  | 104709086 | 104859028          | 104867025    | 4                    | 104695402                      | 104991787    | rs1926030  | 1.19E-12  | Genome-wide         | 0.081                                  | 104837903                        | 104943041    | NT5C2       | 22978        |
| rs3825807                                             | 15  | 76876166  | 76845627           | 76886593     | 4                    | 76869486                       | 76912484     | rs12438008 | 4.76E-08  | 0.001               | 0.3049                                 | 76838600                         | 76890830     | ADAMTS7     | 11173        |
| rs216172                                              | 17  | 2073254   | 2142838            | 2150203      | 6                    | 2045089                        | 2163008      | rs216219   | 5.68E-12  | Genome-wide         | 0.7454                                 | 1909882                          | 2153819      | SMG6        | 23293        |
| rs46522                                               | 17  | 44343596  | 44329733           | 44333352     | 3                    | 44305495                       | 44408827     | rs2291726  | 9.89E-10  | Genome-wide         | 0.9334                                 | 44325127                         | 44328229     | ATP5G1      | 516          |
| rs46522                                               | 17  | 44343596  | 44359722           | 44360508     | 3                    | 44305495                       | 44408827     | rs318095   | 1.73E-09  | Genome-wide         | 1                                      | 44340828                         | 44362724     | UBE2Z       | 65264        |
| rs46522                                               | 17  | 44343596  | 44362496           | 44369126     | 5                    | 44305495                       | 44408827     | rs2291726  | 5.37E-10  | Genome-wide         | 0.9334                                 | 44340828                         | 44362724     | UBE2Z       | 65264        |
| rs46522                                               | 17  | 44343596  | 44362496           | 44369126     | 5                    | 44305495                       | 44408827     | rs2291726  | 5.37E-10  | Genome-wide         | 0.9334                                 | 44362459                         | 44377171     | SNF8        | 11267        |
| rs46522                                               | 17  | 44343596  | 44329733           | 44333352     | 3                    | 44305495                       | 44408827     | rs2291726  | 9.89E-10  | Genome-wide         | 0.9334                                 | 44390916                         | 44400954     | GIP         | 2695         |
| <b>High confidence full transcript AE association</b> |     |           |                    |              |                      |                                |              |            |           |                     |                                        |                                  |              |             |              |
| none                                                  |     |           |                    |              |                      |                                |              |            |           |                     |                                        |                                  |              |             |              |

**Known Loci**

**Window based AE association**

|           |    |           |           |           |   |           |           |            |          |             |       |           |           |          |        |
|-----------|----|-----------|-----------|-----------|---|-----------|-----------|------------|----------|-------------|-------|-----------|-----------|----------|--------|
| rs6725887 | 2  | 203454130 | 203727576 | 203742096 | 5 | 203440515 | 203809573 | rs10188105 | 4.57E-06 | 0.001       | 0.059 | 203587846 | 203659747 | ALS2CR16 | 130029 |
| rs6725887 | 2  | 203454130 | 203727576 | 203742096 | 5 | 203440515 | 203809573 | rs10188105 | 4.57E-06 | 0.001       | 0.059 | 203484415 | 203557439 | ALS2CR8  | 79800  |
| rs6725887 | 2  | 203454130 | 203727576 | 203742096 | 5 | 203440515 | 203809573 | rs10188105 | 4.57E-06 | 0.001       | 0.059 | 203346117 | 203444953 | ICA1L    | 130026 |
| rs6725887 | 2  | 203454130 | 203727576 | 203742096 | 5 | 203440515 | 203809573 | rs10188105 | 4.57E-06 | 0.001       | 0.059 | 203708717 | 203799345 | NBEAL1   | 65065  |
| rs6725887 | 2  | 203454130 | 203727576 | 203742096 | 5 | 203440515 | 203809573 | rs10188105 | 4.57E-06 | 0.001       | 0.059 | 203453574 | 203485194 | WDR12    | 55759  |
| rs3184504 | 12 | 110368991 | 110436550 | 110446964 | 3 | 110317972 | 110614582 | rs593226   | 5.23E-07 | 0.001       | 0.314 | 110608254 | 110679289 | ACAD10   | 80724  |
| rs3184504 | 12 | 110368991 | 110436550 | 110446964 | 3 | 110317972 | 110614582 | rs593226   | 5.23E-07 | 0.001       | 0.314 | 110374401 | 110521863 | ATXN2    | 6311   |
| rs3184504 | 12 | 110368991 | 110436550 | 110446964 | 3 | 110317972 | 110614582 | rs593226   | 5.23E-07 | 0.001       | 0.314 | 110565880 | 110608173 | BRAP     | 8315   |
| rs3184504 | 12 | 110368991 | 110436550 | 110446964 | 3 | 110317972 | 110614582 | rs593226   | 5.23E-07 | 0.001       | 0.314 | 110328134 | 110373809 | SH2B3    | 10019  |
| rs3184504 | 12 | 110368991 | 110610448 | 110625616 | 4 | 110365692 | 110713097 | rs3809276  | 2.09E-09 | Genome-wide | 0.154 | 110608254 | 110679289 | ACAD10   | 80724  |
| rs3184504 | 12 | 110368991 | 110610448 | 110625616 | 4 | 110365692 | 110713097 | rs3809276  | 2.09E-09 | Genome-wide | 0.154 | 110688728 | 110732165 | ALDH2    | 217    |
| rs3184504 | 12 | 110368991 | 110610448 | 110625616 | 4 | 110365692 | 110713097 | rs3809276  | 2.09E-09 | Genome-wide | 0.154 | 110374401 | 110521863 | ATXN2    | 6311   |
| rs3184504 | 12 | 110368991 | 110610448 | 110625616 | 4 | 110365692 | 110713097 | rs3809276  | 2.09E-09 | Genome-wide | 0.154 | 110565880 | 110608173 | BRAP     | 8315   |
| rs3184504 | 12 | 110368991 | 110610448 | 110625616 | 4 | 110365692 | 110713097 | rs3809276  | 2.09E-09 | Genome-wide | 0.154 | 110328134 | 110373809 | SH2B3    | 10019  |

**High confidence full transcript AE association**

|              |   |           |    |    |    |           |           |            |          |       |       |           |           |         |        |
|--------------|---|-----------|----|----|----|-----------|-----------|------------|----------|-------|-------|-----------|-----------|---------|--------|
| rs17464857** | 1 | 220829332 | NA | NA | NA | 220804104 | 221023703 | rs17532708 | 1.09E-08 | 0.001 | 0.253 | 220977180 | 220990625 | FAM177B | 400823 |
|--------------|---|-----------|----|----|----|-----------|-----------|------------|----------|-------|-------|-----------|-----------|---------|--------|

\*Significance level is based on permutation analysis and is compartmentalized into three categories:  $0.001 < P < 0.005$ ,  $7.6 \times 10^{-9}$  (genomewide)  $< P < 0.001$ ,  $P < 7.6 \times 10^{-9}$  (genomewide)

\*\*This AE imbalance was missed by window based approach either because of low-magnitude AE or due to window partitions excluding informative sections of the transcript

**Additional Table 6:** Novel and known coronary artery disease loci associated with other traits and diseases.

| Region   | Lead SNP for CAD | Other trait mapped to the region        | Lead SNP for other trait | r <sup>2</sup> | D'   | P for CAD of lead SNP for other trait | Reported genes in region     | Ref |
|----------|------------------|-----------------------------------------|--------------------------|----------------|------|---------------------------------------|------------------------------|-----|
| 1p13.3   | rs646776         | LDL cholesterol                         | rs12740374               | 1.00           | 1.00 | 1.64E-09                              | CELSR2, PSRC1, SORT1         | 1   |
| 1p13.3   | rs646776         | Lp-PLA2 activity and mass               | rs599839                 | 1.00           | 1.00 | 2.89E-10                              | PSRC1                        | 2   |
| 9p21.3   | rs4977574        | Glioma                                  | rs4977574                | 0.47           | 0.95 | 4.05E-15                              | CDKN2A, CDKN2B               | 3   |
| 9p21.3   | rs4977574        | Intracranial aneurysm                   | rs1333040                | 0.67           | 1.00 | 6.99E-09                              | CDKN2A,CDKN2B                | 4   |
| 9q34.2   | rs579459         | Angiotensin-converting enzyme activity  | rs495828                 | 1.00           | 1.00 | 1.63E-07                              | ABO                          | 5   |
| 9q34.2   | rs579459         | Hematological and biochemical traits    | rs495828                 | 1.00           | 1.00 | 1.63E-07                              | ABO                          | 6   |
| 9q34.2   | rs579459         | Pancreatic cancer                       | rs505922                 | 0.38           | 0.88 | 7.14E-06                              | ABO                          | 7   |
| 9q34.2   | rs579459         | Plasma E-selectin levels                | rs651007                 | 0.95           | 1.00 | 5.53E-07                              | ABO                          | 8   |
| 9q34.2   | rs579459         | Protein quantitative trait loci         | rs505922                 | 0.38           | 0.88 | 7.14E-06                              | ABO                          | 9   |
| 9q34.2   | rs579459         | Serum soluble E-selectin                | rs579459                 | 0.38           | 0.88 | 1.16E-07                              | ABO                          | 10  |
| 9q34.2   | rs579459         | Soluble levels of adhesion molecules    | rs649129                 | 1.00           | 1.00 | 1.09E-07                              | ABO                          | 11  |
| 9q34.2   | rs579459         | Venous thromboembolism                  | rs505922                 | 0.38           | 0.88 | 7.14E-06                              | ABO                          | 12  |
| 10q24.32 | rs12413409       | Intracranial aneurysm                   | rs12413409               | 1.00           | 1.00 | 1.47E-06                              | CNNM2                        | 4   |
| 10q24.32 | rs12413409       | Systolic blood pressure                 | rs11191548               | 1.00           | 1.00 | 1.31E-05                              | CYP17A1, AS3MT, CNNM2, NT5C2 | 13  |
| 11q23.3  | rs964184         | HDL cholesterol                         | rs964184                 | 1.00           | 1.00 | 8.02E-10                              | APOA1, APOC3, APOA4, APOA5   | 14  |
| 11q23.3  | rs964184         | Hematological and biochemical traits    | rs7350481                | 0.28           | 0.81 | 8.50E-06                              | APO-A cluster                | 6   |
| 11q23.3  | rs964184         | LDL cholesterol                         | rs12272004               | 0.51           | 1.00 | 2.19E-02                              | APOA1, APOA4, APOA5, APOC3   | 14  |
| 11q23.3  | rs964184         | LDL cholesterol                         | rs6589566                | 0.31           | 1.00 | 2.15E-06                              | APOA1,APOC3,APOA5            | 15  |
| 11q23.3  | rs964184         | Lp-PLA2 activity and mass               | rs12286037               | 0.59           | 1.00 | 4.98E-04                              | ZNF259                       | 2   |
| 11q23.3  | rs964184         | Plasma carotenoid and tocopherol levels | rs12272004               | 0.51           | 1.00 | 1.29E-02                              | APOA5                        | 16  |
| 11q23.3  | rs964184         | Triglycerides                           | rs964184                 | 1.00           | 1.00 | 8.02E-10                              | APOA1, APOC3, APOA4, APOA5   | 1   |
| 15q25.1  | rs3825807        | Lung adenocarcinoma                     | rs1051730                | 0.21           | 0.51 | 7.00E-01                              | CHRNA3, CHRNA5               | 17  |
| 15q25.1  | rs3825807        | Smoking behavior                        | rs1051730                | 0.21           | 0.51 | 7.00E-01                              | NR                           | 18  |

| Region         | Lead SNP for CAD | Other trait mapped to the region | Lead SNP for other trait | r <sup>2</sup> | D'          | P for CAD of lead SNP for other trait | Reported genes in region      | Ref       |
|----------------|------------------|----------------------------------|--------------------------|----------------|-------------|---------------------------------------|-------------------------------|-----------|
| 12q24.12       | rs3184504        | Celiac disease                   | rs653178                 | 1.00           | 1.00        | 2.20E-06                              | SH2B3                         | 19        |
| 12q24.12       | rs3184504        | Chronic kidney disease           | rs653178                 | 1.00           | 1.00        | 2.20E-06                              | ATXN2                         | 20        |
| 12q24.12       | rs3184504        | Diastolic blood pressure         | rs3184504                | 1.00           | 1.00        | 6.35E-06                              | SH2B3                         | 21        |
| 12q24.12       | rs3184504        | Diastolic blood pressure         | rs653178                 | 1.00           | 1.00        | 2.20E-06                              | ATXN2, SH2B3                  | 13        |
| 12q24.12       | rs3184504        | Hematocrit                       | rs11065987               | 0.69           | 0.96        | 5.62E-07                              | SH2B3, ATXN2                  | 22        |
| 12q24.12       | rs3184504        | Hemoglobin                       | rs11065987               | 0.69           | 0.96        | 5.62E-07                              | TRAFD1                        | 22        |
| 12q24.12       | rs3184504        | Plasma eosinophil count          | rs3184504                | 1.00           | 1.00        | 6.35E-06                              | SH2B3                         | 23        |
| 12q24.12       | rs3184504        | Systolic blood pressure          | rs3184504                | 1.00           | 1.00        | 6.35E-06                              | SH2B3                         | 21        |
| 12q24.12       | rs3184504        | Type 1 diabetes                  | rs3184504                | 1.00           | 1.00        | 6.35E-06                              | SH2B3                         | 24        |
| <b>17p13.3</b> | <b>rs216172</b>  | <b>Aortic root size</b>          | <b>rs10852932</b>        | <b>0.73</b>    | <b>0.90</b> | <b>5.23E-05</b>                       | <b>SMG6, SRR, TSR1, SGSM2</b> | <b>25</b> |

Selection is based on the report in the NHGRI catalogue of published GWAS with genomewide level of significance ( $P < 5 \times 10^{-8}$ ), based on a 1 mega base maximum distance and linkage disequilibrium ( $r^2 > 0.2$ ) between the SNPs. Novel loci are in bold. Date of access June 28<sup>th</sup> 2010.

Lead SNP for other trait: SNP has documented  $P < 5 \times 10^{-8}$  for association with other trait listed (reference in superscript)

$r^2$ ,  $D'$ : Linkage disequilibrium between lead SNP for coronary artery disease and lead SNP for other trait (HapMap)

P for CAD of lead SNP for other trait: P for association of the lead SNP from other trait with coronary artery disease in the CARDIoGRAM meta-analysis discovery phase

## References

1. Kathiresan, S. *et al.* Common variants at 30 loci contribute to polygenic dyslipidemia. *Nat Genet* **41**, 56-65 (2009).
2. Suchindran, S. *et al.* Genome-wide association study of Lp-PLA(2) activity and mass in the Framingham Heart Study. *PLoS Genet* **6**, e1000928 (2010).
3. Shete, S. *et al.* Genome-wide association study identifies five susceptibility loci for glioma. *Nat Genet* **41**, 899-904 (2009).
4. Yasuno, K. *et al.* Genome-wide association study of intracranial aneurysm identifies three new risk loci. *Nat Genet* **42**, 420-5 (2010).
5. Chung, C.M. *et al.* A genome-wide association study identifies new loci for ACE activity: potential implications for response to ACE inhibitor. *Pharmacogenomics J* (2010).
6. Kamatani, Y. *et al.* Genome-wide association study of hematological and biochemical traits in a Japanese population. *Nat Genet* **42**, 210-5 (2010).
7. Amundadottir, L. *et al.* Genome-wide association study identifies variants in the ABO locus associated with susceptibility to pancreatic cancer. *Nat Genet* **41**, 986-90 (2009).
8. Qi, L. *et al.* Genetic variants in ABO blood group region, plasma soluble E-selectin levels and risk of type 2 diabetes. *Hum Mol Genet* **19**, 1856-62 (2010).
9. Melzer, D. *et al.* A genome-wide association study identifies protein quantitative trait loci (pQTLs). *PLoS Genet* **4**, e1000072 (2008).
10. Paterson, A.D. *et al.* Genome-wide association identifies the ABO blood group as a major locus associated with serum levels of soluble E-selectin. *Arterioscler Thromb Vasc Biol* **29**, 1958-67 (2009).
11. Barbalic, M. *et al.* Large-scale genomic studies reveal central role of ABO in sP-selectin and sICAM-1 levels. *Hum Mol Genet* **19**, 1863-72 (2010).
12. Tregouet, D.A. *et al.* Common susceptibility alleles are unlikely to contribute as strongly as the FV and ABO loci to VTE risk: results from a GWAS approach. *Blood* **113**, 5298-303 (2009).
13. Newton-Cheh, C. *et al.* Genome-wide association study identifies eight loci associated with blood pressure. *Nat Genet* (2009).
14. Aulchenko, Y.S. *et al.* Loci influencing lipid levels and coronary heart disease risk in 16 European population cohorts. *Nat Genet* **41**, 47-55 (2009).
15. Wallace, C. *et al.* Genome-wide association study identifies genes for biomarkers of cardiovascular disease: serum urate and dyslipidemia. *Am J Hum Genet* **82**, 139-49 (2008).
16. Ferrucci, L. *et al.* Common variation in the beta-carotene 15,15'-monooxygenase 1 gene affects circulating levels of carotenoids: a genome-wide association study. *Am J Hum Genet* **84**, 123-33 (2009).
17. Landi, M.T. *et al.* A genome-wide association study of lung cancer identifies a region of chromosome 5p15 associated with risk for adenocarcinoma. *Am J Hum Genet* **85**, 679-91 (2009).
18. Thorgeirsson, T.E. *et al.* Sequence variants at CHRN3-CHRNA6 and CYP2A6 affect smoking behavior. *Nat Genet* **42**, 448-53 (2010).
19. Dubois, P.C. *et al.* Multiple common variants for celiac disease influencing immune gene expression. *Nat Genet* **42**, 295-302 (2010).
20. Kottgen, A. *et al.* New loci associated with kidney function and chronic kidney disease. *Nat Genet* **42**, 376-84 (2010).
21. Levy, D. *et al.* Genome-wide association study of blood pressure and hypertension. *Nat Genet* (2009).
22. Ganesh, S.K. *et al.* Multiple loci influence erythrocyte phenotypes in the CHARGE Consortium. *Nat Genet* **41**, 1191-8 (2009).

23. Gudbjartsson, D.F. *et al.* Sequence variants affecting eosinophil numbers associate with asthma and myocardial infarction. *Nat Genet* **41**, 342-7 (2009).
24. Barrett, J.C. *et al.* Genome-wide association study and meta-analysis find that over 40 loci affect risk of type 1 diabetes. *Nat Genet* (2009).
25. Vasan, R.S. *et al.* Genetic variants associated with cardiac structure and function: a meta-analysis and replication of genome-wide association data. *JAMA* **302**, 168-78 (2009).
